# Supplementary material
Source: HighWire-hosted journal article supplement (https://bmjopenquality.bmj.com/highwire/filestream/136059/field_highwire_adjunct_files/1/ds4648.docx)
Supplement: ds4648.docx [file ds4648.docx]

**PDSA Cycle [Number]**

**Aim:** what are you trying to accomplish?

Improve trauma theatre start times

**Plan:** what will your test be?

Initiate a ‘golden patient’, a nominated patient who will be first on the list for theatre the following day and ensure that all work-up has been perform for the patient by the necessary teams ready for the patient to be sent for at 8am.

**Prediction:** what do you think will happen as a result of your test?

Theatre start times will be improved as shown on the recorded start times of the trauma theatre.

**Do:** what happened when you carried out your test?

On the days when the intervention took place the theatre start times demonstrated a significant improvement in start times. The days in which it was taken up was somewhat variable however particularly on days I was not able to oversee the intervention.

**Study:** how did the results of your test compare with predictions?

The results were very positive demonstrating a one-hour improvement in theatre start times on those days the intervention was used.

**Act:** how will you change your previous test in light of what you have learned?

Active discussion with the orthopaedic SHOs and other team members involved in the intervention and discuss ways we can make it easy to enact the change everyday.
